# Supplementary material
Source: PubMed Central journal article supplement (PMC5536199)
Supplement: NIHMS73503-supplement-Supplementary_Tables_and_Figures.pdf [file NIHMS73503-supplement-Supplementary_Tables_and_Figures.pdf]

## S1. Full study criteria for the empirical investigation.

| <b>Inclusion criteria</b>            | <b>Exclusion criteria</b>                                                      |
|--------------------------------------|--------------------------------------------------------------------------------|
| Age between 65 and 75 years          | Any neurological illness (MMSE <sup>1</sup> <26 excluded)                      |
| Available for all parts of the study | Any psychiatric illness (history of mild-moderate depression/anxiety included) |
| Fluency in the Swedish language      | Any head trauma with resulting unconsciousness                                 |
| Normal/corrected vision              | Any brain damage                                                               |
| Normal/corrected hearing             | Any medication with effects on the central nervous system                      |
|                                      | Cardiovascular disease (high blood pressure included)                          |
|                                      | Diabetes Type 2 (dietary treatment included)                                   |
|                                      | Cancer (successful treatment completed >1 year earlier included)               |
|                                      | Skin disease                                                                   |
|                                      | Migraine                                                                       |
|                                      | Colour blindness                                                               |
|                                      | Previous study participation involving cognitive testing                       |

<sup>1</sup>MMSE = Mini Mental State Exam (Folstein, Folstein, & McHugh, 1975)

S2. List of tests included in the cognitive test battery used to assess effects of the intervention period.

| <b>Domain</b> (latent variable <sup>1</sup> ) | <b>Tasks</b> (observed variable <sup>2</sup> ) |                                                  |
|-----------------------------------------------|------------------------------------------------|--------------------------------------------------|
| <i>Updating Trained</i>                       | N-back                                         | Task and stimuli trained in WM training          |
|                                               | Running span                                   | Task and stimuli trained in WM training          |
| <i>Switching Trained</i>                      | Task switching                                 | Task and stimuli trained in WM training          |
|                                               | Rule switching                                 | Task and stimuli trained in WM training          |
| <i>Updating Untrained Stimuli</i>             | N-back                                         | Task but not stimuli trained in WM training      |
|                                               | Running span                                   | Task but not stimuli trained in WM training      |
| <i>Switching Untrained Stimuli*</i>           | Task switching                                 | Task but not stimuli trained in WM training      |
|                                               | Rule switching                                 | Task but not stimuli trained in WM training      |
| <i>Updating Untrained Task</i>                | Spatial updating                               | Task not trained in WM or control training       |
|                                               | Numerical updating                             | Task not trained in WM or control training       |
| <i>Switching Untrained Task*</i>              | Spatial switching                              | Task not trained in WM or control training       |
|                                               | Numerical switching                            | Task not trained in WM or control training       |
| <i>Spatial reasoning</i>                      | Ravens progressive matrices                    | Task not trained in WM or control training       |
|                                               | WASI-II matrices                               | Task not trained in WM or control training       |
|                                               | BETA-III matrices                              | Task not trained in WM or control training       |
| <i>Verbal reasoning</i>                       | ETS kit verbal inference                       | Task not trained in WM or control training       |
|                                               | BIS analogies                                  | Task not trained in WM or control training       |
|                                               | Syllogisms                                     | Task not trained in WM or control training       |
| <i>Episodic memory</i>                        | Spatial memory                                 | Task not trained in WM or control training       |
|                                               | Verbal memory                                  | Task not trained in WM or control training       |
| <i>Sustained attention*</i>                   | Temporal expectancy task 1                     | Task not trained in WM or control training       |
|                                               | Temporal expectancy task 2                     | Task not trained in WM or control training       |
| <i>Perceptual speed</i>                       | Perceptual matching                            | Task and stimuli trained in control training     |
|                                               | Perceptual matching                            | Task but not stimuli trained in control training |

<sup>1</sup> Domains represented latent variables in the LCS models

<sup>2</sup> Tasks represented observed variables in the LCS models

\* Cognitive variables that did not meet minimum criteria for analysis

## S3. Detailed descriptions of tasks included in the cognitive test battery.

| Domain                             | Task                              | Task description                                                                                                                                                                                                                                                                                                                                                                                                                                     | Dependent measure                                                        | Max score |
|------------------------------------|-----------------------------------|------------------------------------------------------------------------------------------------------------------------------------------------------------------------------------------------------------------------------------------------------------------------------------------------------------------------------------------------------------------------------------------------------------------------------------------------------|--------------------------------------------------------------------------|-----------|
| <i>Updating Trained</i>            | N-back, trained stimuli           | See task description for N-back in Supplementary Table 6. The test consisted of four runs of single 2-back and four runs of single 3-back. The stimuli set consisted of shapes, which was used during training. 192 stimuli were shown, of which 64 were targets (33%). Completion time was approximately 15 minutes.                                                                                                                                | (Number hits / total targets) + (number correct rejections/ total foils) | 1.0       |
|                                    | Running span, trained stimuli     | See task description for Running span in Supplementary Table 6. Responses were required at 10 occasions at the 2-last dual level and at 10 occasions at the 3-last single level with a maximum number of correct per trial of 4 and 3, respectively. The stimuli set consisted of letters and shapes, which was used during training. Completion time was approximately 15 minutes.                                                                  | Average number correct per trial (reflected log transform)               | 3.5       |
| <i>Switching Trained</i>           | Task switching, trained stimuli   | See task description for Task switching in Supplementary Table 6. The test consisted of four runs, which each involved judging 40 stimuli. The rule switched on 64 of the 160 trials (40% switch trials). The stimuli set consisted of a circle/rectangle with horizontal/vertical line and a consonant/vowel presented with an even/uneven number, which was used during training. Completion time was approximately 10 minutes.                    | Number correct per minute                                                | n/a       |
|                                    | Rule switching, trained stimuli   | See task description for Rule switching in Supplementary Table 6. The test consisted of four runs, which each involved sorting 58 stimuli. The rule switched on 64 of the 232 trials. The stimuli set consisted cards that could be sorted on the type/number and colour of the symbols on the cards, which was used during training. Two rules were required: type of symbols, colour of the symbols. Completion time was approximately 10 minutes. | Number correct per minute                                                | n/a       |
| <i>Updating Untrained Stimuli</i>  | N-back, untrained stimuli         | See task description for N-back in Supplementary Table 6. The test consisted of four runs of single 2-back and four runs of single 3-back. The stimuli set consisted of six photographic images (e.g. clouds, fire), which was not used during training. 192 stimuli were shown, of which 64 were targets (33%). Completion time was approximately 15 minutes.                                                                                       | (Number hits / total targets) + (number correct rejections/ total foils) | 1.0       |
|                                    | Running span, untrained stimuli   | See task description for Running span in Supplementary Table 6. Responses were required at 10 occasions at the 2-last dual level and at 10 occasions at the 3-last single level with a maximum number of correct per trial of 4 and 3, respectively. The stimuli set consisted of dice presented in different colours showing 1-3 pips, which was not used during training. Completion time was approximately 15 minutes.                            | Average number correct per trial                                         | 3.5       |
| <i>Switching Untrained Stimuli</i> | Task switching, untrained stimuli | See task description for Task switching in Supplementary Table 6. The test consisted of four runs, which each involved judging 40                                                                                                                                                                                                                                                                                                                    | Number correct per minute                                                | n/a       |

|                                 |                                   |                                                                                                                                                                                                                                                                                                                                                                                                                                                                                                                                                                                                                                                                                                                                                                                               |                                  |     |
|---------------------------------|-----------------------------------|-----------------------------------------------------------------------------------------------------------------------------------------------------------------------------------------------------------------------------------------------------------------------------------------------------------------------------------------------------------------------------------------------------------------------------------------------------------------------------------------------------------------------------------------------------------------------------------------------------------------------------------------------------------------------------------------------------------------------------------------------------------------------------------------------|----------------------------------|-----|
|                                 |                                   | stimuli. The rule switched on 64 of the 160 trials (40% switch trials). The stimuli set consisted of a coloured/black-white object that was edible/non-edible, which was not used during training. Completion time was approximately 10 minutes.                                                                                                                                                                                                                                                                                                                                                                                                                                                                                                                                              |                                  |     |
|                                 | Rule switching, untrained stimuli | See task description for Rule switching in Supplementary Table 4. The test consisted of four runs, which each involved sorting 58 stimuli based on two rules. The rule switched on 64 of the 232 trials. The stimuli set comprised moving a ball into one of four locations using different schemas. Two rules were required: placement in the location just below the current location of the ball, placement in the location below-and-diagonal to the current location of the ball. Completion time was approximately 10 minutes.                                                                                                                                                                                                                                                          | Number correct per minute        | n/a |
| <i>Updating Untrained Task</i>  | Spatial updating                  | In each block of this task, first a display of three 3x3 was shown for 4000 ms in each of which one blue dot was present in one of the nine locations. Those four locations had to be memorized and updated according to shifting operations, which were indicated by arrows appearing below the corresponding field. Presentation time of the arrows was 3000 ms with an inter-stimulus interval of 250 ms. After six updating operations, the three grids reappeared and the resulting end positions had to be clicked on. Ten trials were included in the test. Completion time was approximately 10 minutes.                                                                                                                                                                              | Average number correct per trial | 3.0 |
|                                 | Numerical updating                | Four single digits (ranging from 1 to 9) were presented simultaneously in four cells situated horizontally for 3000 ms. After an inter-stimulus interval of 250 ms, a sequence of eight updating operations were presented in a second row of four cells below the first one. These updating operations were additions and subtractions within a range -9 to +9. Each updating operation was applied to a different cell from the one a step earlier in the sequence, so that no two updating operations had to be applied to one cell in a sequence. Those updating operations had to be applied to the digits memorized from the corresponding cells above and the updated results had to be memorized. Ten trials were included in the test. Completion time was approximately 10 minutes. | Average number correct per trial | 4.0 |
| <i>Switching Untrained Task</i> | Spatial switching                 | One each trial a figure consisting of three circles connected by lines to form an arrow shape (< or >) was presented, with rightward pointing or leftward pointing arrow symbols inside of the circles. If the figure was presented at the bottom half of the screen, the task was to judge the direction of the arrow symbols inside of the circles. If the figure was presented at the top half of the screen, the task was to judge the direction of the arrow formation of the figure itself. The test consisted of four runs, which each involved                                                                                                                                                                                                                                        | Number correct per minute        | n/a |

|                          |                             |                                                                                                                                                                                                                                                                                                                                                                                                                                                                                                                                                                                                    |                                  |     |
|--------------------------|-----------------------------|----------------------------------------------------------------------------------------------------------------------------------------------------------------------------------------------------------------------------------------------------------------------------------------------------------------------------------------------------------------------------------------------------------------------------------------------------------------------------------------------------------------------------------------------------------------------------------------------------|----------------------------------|-----|
|                          |                             | judging 40 stimuli. The rule switched on 64 of the 160 trials (40% switch trials). Completion time was approximately 10 minutes.                                                                                                                                                                                                                                                                                                                                                                                                                                                                   |                                  |     |
|                          | Numerical switching         | One each trial a figure consisting of three circles connected by lines to form an arrow shape (< or >) was presented, moving in a leftward or rightward direction. If a low (1-3) number was present in the circles, the task was to judge the movement of the figure. If a high (7-9) number was presented in the circles, the task was to judge the direction of the arrow formation of the figure itself. The test consisted of four runs, which each involved judging 40 stimuli. The rule switched on 64 of the 160 trials (40% switch trials). Completion time was approximately 10 minutes. | Number correct per minute        | n/a |
| <i>Spatial reasoning</i> | Ravens progressive matrices | The task involved completing as many of the 18 trials within a 12-minute time limit. Each trial consisted of increasingly complex visual geometric designs with a missing piece. The task was to select the missing piece from eight alternatives.                                                                                                                                                                                                                                                                                                                                                 | Number correct within time limit | 18  |
|                          | WASI-II matrices            | The task involved completing as many of the 30 trials within a 15-minute time limit. Each trial consisted of increasingly complex visuospatial objects with a missing piece. The task was to select the missing piece from five alternatives.                                                                                                                                                                                                                                                                                                                                                      | Number correct within time limit | 30  |
|                          | BETA-III matrices           | The task involved completing as many of the 25 trials within a 10-minute time limit. Each trial consisted of increasingly complex visual geometric designs with a missing piece. The task was to select the missing piece from five alternatives.                                                                                                                                                                                                                                                                                                                                                  | Number correct within time limit | 25  |
| <i>Verbal reasoning</i>  | ETS kit verbal inference    | The task involved completing as many of the 20 verbal inference trials as possible within a 12-minute time limit. The task involved selecting the valid conclusion given the information given in a verbal statement. Example trial: One year a particular farmer's stand of wheat yielded 40 bushels per acre. 1) The farmer's land is extremely fertile 2) The farmer has raised wheat on his land 3) The weather that year was unfavourable for growing wheat 4) Forty bushels per acre is a high yield 5) The field would be more suitable for some other crop                                 | Number correct within time limit | 20  |
|                          | BIS analogies               | The task involved completing as many of the twelve analogies within a 5-minute time limit. The task involved finding completing analogies. Example trial: Newspaper is to text as speaker is to 1) sound 2) song 3) news 4) listening 5) stereo                                                                                                                                                                                                                                                                                                                                                    | Number correct within time limit | 12  |
|                          | Syllogisms                  | The task involved completing as many of the 30 syllogism trials within a 20-minute time limit. The task on each trial was to decide whether the conclusion that followed the premises was valid or not. Example trial: All trees are fish. All fish are horses. Therefore all trees are horses. 1) valid conclusion 2) invalid conclusion                                                                                                                                                                                                                                                          |                                  | 30  |
| <i>Episodic memory</i>   | Spatial memory              | Sequences of 12 colored photographs of real-world objects were displayed at different locations in a 6x6 grid. Each photograph was                                                                                                                                                                                                                                                                                                                                                                                                                                                                 | Number correct                   | 24  |

|                            |                                        |                                                                                                                                                                                                                                                                                                                                                                                                                                                   |                              |     |
|----------------------------|----------------------------------------|---------------------------------------------------------------------------------------------------------------------------------------------------------------------------------------------------------------------------------------------------------------------------------------------------------------------------------------------------------------------------------------------------------------------------------------------------|------------------------------|-----|
|                            |                                        | presented for 8000ms with an inter-stimulus interval of 1000ms. After presentation, objects appeared at the right side of the screen and had to be moved in the correct order to the correct locations by clicking on the objects and the locations with the computer mouse. Two trials were included in the test.                                                                                                                                |                              |     |
|                            | Verbal memory                          | Sequences of 16 nouns were presented in the middle of the screen. Each noun was presented for 6000ms with an inter-stimulus interval of 1000ms. After presentation, the nouns had to be recalled by typing in the word into a blank field. Two trials were included in the test.                                                                                                                                                                  | Number correct               | 32  |
| <i>Sustained attention</i> | Temporal expectancy task version 1     | The task involved a black-and-white pattern of small triangles, which shifted direction after a standard presentation time of 800ms. The task was to detect when the presentation time had been extended to 1070ms. The task comprised five 4-minute blocks. Each block had 286 trials, of which 24 were targets (8%). Number of hits were expected to decrease linearly for each sequential block. Completion time was approximately 25 minutes. | Individual slope coefficient | n/a |
|                            | Temporal expectancy task version 2     | The task involved a blue-and-yellow pattern of waves, which shifted direction after a standard presentation time of 800ms. The task was to detect when the presentation time had been extended to 1070ms. The task comprised five 4-minute blocks. Each block had 286 trials, of which 24 were targets (8%). Number of hits was expected to decrease linearly for each sequential block. Completion time was approximately 25 minutes.            | Individual slope coefficient | n/a |
| <i>Perceptual speed</i>    | Perceptual matching, trained stimuli   | See task description for Perceptual matching in Supplementary Table 6. The test consisted of four runs with 50 trials in each run. 50% of the 4-item stimuli strings were identical and 50% were different. For different string pairs, one item in the string differed. The stimuli set comprised letters, which was included in the control training. Completion time was approximately 10 minutes.                                             | Number correct per minute    | n/a |
|                            | Perceptual matching, untrained stimuli | See task description for Perceptual matching in Supplementary Table 6. The test consisted of four runs with 50 trials in each run. 50% of the 4-item stimuli strings were identical and 50% were different. For different string pairs, one item in the string differed. The stimuli set comprised a set of 3d figures, which was not included in the control training. Completion time was approximately 10 minutes.                             | Number correct per minute    | n/a |

## S4. Detailed descriptions of training tasks.

| <b>Working Memory Training</b> |                |                                                                                                                                                                                                                                                                                                                                                                                                                                                                                                                                                                                                                                                                                                                                                                                                                                                                                                                                                                                                                                                                                                                                                                                                                                                 |
|--------------------------------|----------------|-------------------------------------------------------------------------------------------------------------------------------------------------------------------------------------------------------------------------------------------------------------------------------------------------------------------------------------------------------------------------------------------------------------------------------------------------------------------------------------------------------------------------------------------------------------------------------------------------------------------------------------------------------------------------------------------------------------------------------------------------------------------------------------------------------------------------------------------------------------------------------------------------------------------------------------------------------------------------------------------------------------------------------------------------------------------------------------------------------------------------------------------------------------------------------------------------------------------------------------------------|
| Trained domain                 | Task           | Task description                                                                                                                                                                                                                                                                                                                                                                                                                                                                                                                                                                                                                                                                                                                                                                                                                                                                                                                                                                                                                                                                                                                                                                                                                                |
| Updating                       | N-back         | Stimuli were presented on the screen, one by one, and the task was to press a button whenever the currently shown stimulus was the same as the one presented N steps back in the series. Difficulty was varied by the number of steps (2-back, 3-back) and whether the stimuli were evaluated based on one or two aspects of the stimuli (single, dual). For example, a dual 2-back task required participants to base their decision on the word <i>and</i> the colour of the stimulus (targets marked with *): <i>sofa</i> , <i>football</i> , <i>chest</i> , <i>football*</i> , <i>tree*</i> , <i>sofa</i> , <i>football</i> , <i>sofa*</i> . The four stimuli sets included words and colours, shape and patterns, shape and position in a 3x3 grid, and, number and position in a 3x3 grid. With the exception of position, which included 9 items, stimuli sets consisted of six items. Each stimulus was presented for 2250ms with an interstimulus interval of 250ms. 24 stimuli were presented for each of the eight 1-minute runs with an average of 30% of the stimuli in a run representing targets. Level criteria were expressed as number correct for each run, with both hits and correct rejections contributing to the score. |
| Updating                       | Running span   | Stimuli were presented on the screen, one by one, and the task was to remember the N last stimuli. The difficulty was varied by how many stimuli that had to be remembered (2 last, 3 last) and by presenting one or two series of stimuli simultaneously (single, dual). For example, a 2-last dual task required participants to indicate the two last pairs of stimuli whenever the stimuli stream stopped (targets marked with *): <i>money-chair</i> , <i>money-car</i> , <i>ball-chair</i> , <i>elephant*-plane*</i> , <i>elephant*-car*</i> (stimuli presented as images). The four stimuli sets included two image sets like in the example, letter and shape, word and colour, and, number and position in a 3x3 grid. With the exception of position, which included 9 items, stimuli sets consisted of three items. Each stimulus was presented for 2000 ms with an inter-stimulus interval of 250 ms. For each of the three runs, a response was required 8 times. At response, all stimuli items were presented and participants responded by clicking the items in the correct order within 8 seconds. Level criteria were expressed as number correctly identified stimuli items for each run.                                   |
| Switching                      | Task switching | Stimuli were presented on the screen, one by one, underneath one-word questions present on the screen. The questions specified which aspect of the stimulus to attend to and on which criteria to make a judgment. For example, the question “vowel?” required attention to the letter in the stimuli item “E4” and to make a judgment according to whether the letter                                                                                                                                                                                                                                                                                                                                                                                                                                                                                                                                                                                                                                                                                                                                                                                                                                                                          |

|                                            |                     |                                                                                                                                                                                                                                                                                                                                                                                                                                                                                                                                                                                                                                                                                                                                                                                                                                                                                                                                                                                                                                                                                                                                                                                                    |
|--------------------------------------------|---------------------|----------------------------------------------------------------------------------------------------------------------------------------------------------------------------------------------------------------------------------------------------------------------------------------------------------------------------------------------------------------------------------------------------------------------------------------------------------------------------------------------------------------------------------------------------------------------------------------------------------------------------------------------------------------------------------------------------------------------------------------------------------------------------------------------------------------------------------------------------------------------------------------------------------------------------------------------------------------------------------------------------------------------------------------------------------------------------------------------------------------------------------------------------------------------------------------------------|
|                                            |                     | <p>was a vowel or not. If the next stimulus was presented underneath a different question, participants were required to switch their attention. Difficulty level was varied by number of stimuli types per set (one, two), number of questions per stimuli type (one, two) and the frequency at which the stimuli was presented underneath a different question (every 3-4 trial, every 2-3 trials, every 1-2 trials). Each of the four stimuli sets included two stimuli types with two aspects each: a circle/rectangle with horizontal/vertical line and a consonant/vowel presented with an even/uneven number, a triangle/pentagon with dots/stripes and a word representing an animal/transport with more/less than six letters, small triangles/squares making up a larger triangle/square and a number lower/higher than seven written in capital/lowercase letters, and, two ellipses of the same/different size presented vertically/horizontally and a word/non-word presented in italic/non-italic font. Once a response was made the next stimulus was presented. Level criteria were expressed as number correctly answered questions within the eight 1-minute runs.</p>           |
| Switching                                  | Rule switching      | <p>Stimuli were presented on the screen, one by one, and the task was to sort the stimuli into four categories presented at the bottom of the screen according to different rules given to participants before each run. For example, cards were required to be sorted based on the number or colour of the symbols on the card. Participants received feedback on each trial on whether the correct rule had been selected or not, requiring a switch to a different rule when given an error. Difficulty level was varied by the number of rules (2, 3) and how often the rule changed (every 4-5 trials, every 3-4 trials). The four stimuli sets included objects that could be sorted by object/colour/ownership, cards that could be sorted on the type/number and colour of the symbols on the cards, cards that could be sorted on the pattern of the background/circle/triangle shapes on the cards and words that could be sorted on the word/colour/category of the word. Once a response was made the next stimulus was presented. Level criteria were expressed as number of correctly sorted stimuli within the eight 1-minute runs, allowing for one error after a rule switch.</p> |
| <b>Perceptual speed (control) training</b> |                     |                                                                                                                                                                                                                                                                                                                                                                                                                                                                                                                                                                                                                                                                                                                                                                                                                                                                                                                                                                                                                                                                                                                                                                                                    |
| Perceptual speed                           | Perceptual matching | <p>Pairs of 4-item stimuli strings were presented and the task was to decide whether they were identical or not as quickly as possible. Difficulty was varied by the number of items in the stimuli string that differed (1, 2, 3, 4) and an increased requirement for speed (more correct trials required per run). Once a response was made the next stimulus was presented. Level criteria were expressed as number of correct trials within the 1-minute runs. There were four different task versions, designed to give an equivalent impression to the four tasks used for the working memory training, that differed in regards to the</p>                                                                                                                                                                                                                                                                                                                                                                                                                                                                                                                                                  |



|  |  |                                                                                                                                       |
|--|--|---------------------------------------------------------------------------------------------------------------------------------------|
|  |  | stimuli presented: numbers, letters, colours and 3D figures.<br>There were eight 1-minute runs per task version per training session. |
|--|--|---------------------------------------------------------------------------------------------------------------------------------------|

## S5. Details regarding difficult levels in the training tasks.

|                     |                   |                 | <b>Task switching</b> |                                    |                     |           |
|---------------------|-------------------|-----------------|-----------------------|------------------------------------|---------------------|-----------|
| <b>N-back level</b> | Level description | Criterion (max) | <b>level</b>          | Level description                  |                     | Criterion |
| 1                   | single, 2-back    | 20 (24)         | 1                     | 2 stim type, 1 question/stim type  | SF every 3-4 trials | 40        |
| 2                   | single, 2-back    | 20 (24)         | 2                     | 1 stim type, 1 question/stim type  | SF every 3-4 trials | 40        |
| 3                   | single, 2-back    | 20 (24)         | 3                     | 2 stim type, 2 questions/stim type | SF every 3-4 trials | 40        |
| 4                   | single, 2-back    | 20 (24)         | 4                     | 1 stim type, 2 question/stim type  | SF every 3-4 trials | 40        |
| 5                   | single, 3-back    | 20 (24)         | 5                     | 2 stim type, 1 question/stim type  | SF every 2-3 trials | 40        |
| 6                   | single, 3-back    | 20 (24)         | 6                     | 1 stim type, 1 question/stim type  | SF every 2-3 trials | 40        |
| 7                   | single, 3-back    | 20 (24)         | 7                     | 2 stim type, 2 questions/stim type | SF every 2-3 trials | 40        |
| 8                   | single, 3-back    | 20 (24)         | 8                     | 1 stim type, 2 question/stim type  | SF every 2-3 trials | 40        |
| 9                   | dual, 2-back      | 40 (48)         | 9                     | 2 stim type, 1 question/stim type  | SF every 1-2 trials | 40        |
| 10                  | dual, 2-back      | 40 (48)         | 10                    | 1 stim type, 1 question/stim type  | SF every 1-2 trials | 40        |
| 11                  | dual, 2-back      | 40 (48)         | 11                    | 2 stim type, 2 questions/stim type | SF every 1-2 trials | 40        |
| 12                  | dual, 2-back      | 40 (48)         | 12                    | 1 stim type, 2 question/stim type  | SF every 1-2 trials | 40        |
| 13                  | dual, 3-back      | 40 (48)         | 13                    | 1 stim type, 2 question/stim type  | SF every 1-2 trials | 40        |
| 14                  | dual, 3-back      | 40 (48)         | 14                    | 1 stim type, 2 question/stim type  | SF every 1-2 trials | 40        |
| 15                  | dual, 3-back      | 40 (48)         | 15                    | 1 stim type, 2 question/stim type  | SF every 1-2 trials | 40        |
| 16                  | dual, 3-back      | 40 (48)         | 16                    | 1 stim type, 2 question/stim type  | SF every 1-2 trials | 40        |

  

|                           |                   |                 | <b>Rule switching</b> |                   |                     |           |
|---------------------------|-------------------|-----------------|-----------------------|-------------------|---------------------|-----------|
| <b>Running span level</b> | Level description | Criterion (max) | <b>level</b>          | Level description |                     | Criterion |
| 1                         | single, 2-last    | 12 (14)         | 1                     | 2 rules           | SF every 4-5 trials | 36        |
| 2                         | single, 2-last    | 12 (14)         | 2                     | 2 rules           | SF every 4-5 trials | 36        |
| 3                         | single, 2-last    | 12 (14)         | 3                     | 2 rules           | SF every 4-5 trials | 36        |
| 4                         | single, 2-last    | 12 (14)         | 4                     | 2 rules           | SF every 4-5 trials | 36        |
| 5                         | single, 3-last    | 18 (21)         | 5                     | 2 rules           | SF every 3-4 trials | 36        |
| 6                         | single, 3-last    | 18 (21)         | 6                     | 2 rules           | SF every 3-4 trials | 36        |
| 7                         | single, 3-last    | 18 (21)         | 7                     | 2 rules           | SF every 3-4 trials | 36        |
| 8                         | single, 3-last    | 18 (21)         | 8                     | 2 rules           | SF every 3-4 trials | 36        |
| 9                         | dual, 2-last      | 25 (28)         | 9                     | 3 rules           | SF every 4-5 trials | 36        |
| 10                        | dual, 2-last      | 25 (28)         | 10                    | 3 rules           | SF every 4-5 trials | 36        |
| 11                        | dual, 2-last      | 25 (28)         | 11                    | 3 rules           | SF every 4-5 trials | 36        |
| 12                        | dual, 2-last      | 25 (28)         | 12                    | 3 rules           | SF every 4-5 trials | 36        |
| 13                        | dual, 3-last      | 35 (42)         | 13                    | 3 rules           | SF every 3-4 trials | 36        |
| 14                        | dual, 3-last      | 35 (42)         | 14                    | 3 rules           | SF every 3-4 trials | 36        |
| 15                        | dual, 3-last      | 35 (42)         | 15                    | 3 rules           | SF every 3-4 trials | 36        |
| 16                        | dual, 3-last      | 35 (42)         | 16                    | 3 rules           | SF every 3-4 trials | 36        |

  

| <b>Perceptual matching</b> |                   |              |
|----------------------------|-------------------|--------------|
| <b>level</b>               | Level description | Criterion    |
| 1                          | 4 items differ    | 35 (no max)  |
| 2                          | 4 items differ    | ind score +2 |
| 3                          | 4 items differ    | ind score +2 |
| 4                          | 4 items differ    | ind score +2 |
| 5                          | 3 items differ    | 35 (no max)  |
| 6                          | 3 items differ    | ind score +2 |
| 7                          | 3 items differ    | ind score +2 |
| 8                          | 3 items differ    | ind score +2 |
| 9                          | 2 items differ    | 35 (no max)  |
| 10                         | 2 items differ    | ind score +2 |
| 11                         | 2 items differ    | ind score +2 |

|    |                |              |
|----|----------------|--------------|
| 12 | 2 items differ | ind score +2 |
| 13 | 1 item differs | 35 (no max)  |
| 14 | 1 item differs | ind score +2 |
| 15 | 1 item differs | ind score +2 |
| 16 | 1 item differs | ind score +2 |

---

Note that the working memory training (N-back, Task Switching, Running Span, Rule Switching) alternated between four stimuli sets before difficulty was increased. Four versions of the Perceptual Matching task, implementing different stimuli sets, constituted the control training. The criterion for each difficulty for the control training (4-1 items differ) was fixed for the first level and then based on the individual score. SF = switching frequency.

S6. Descriptive statistics for the cognitive test battery measures used for evaluating the effects of the intervention period, at pretest and posttest, separately for the four experimental groups.

| Domain                      | Task                          | IDCS + working memory |        |      |        | sham + working memory |    |        |        | IDCS + control |        |        |    | sham + control |        |      |        |        |    |        |        |    |        |        |    |
|-----------------------------|-------------------------------|-----------------------|--------|------|--------|-----------------------|----|--------|--------|----------------|--------|--------|----|----------------|--------|------|--------|--------|----|--------|--------|----|--------|--------|----|
|                             |                               | Pre                   |        | Post |        | Pre                   |    | Post   |        | Pre            |        | Post   |    | Pre            |        | Post |        |        |    |        |        |    |        |        |    |
|                             |                               | Mean                  | SD     | n    | Mean   | SD                    | n  | Mean   | SD     | n              | Mean   | SD     | n  | Mean           | SD     | n    | Mean   | SD     | n  |        |        |    |        |        |    |
| Trained Updating            | Running span                  | 1.272                 | 0.181  | 32   | 1.371  | 0.138                 | 31 | 1.289  | 0.140  | 33             | 1.391  | 0.116  | 33 | 1.294          | 0.161  | 30   | 1.309  | 0.158  | 30 | 1.262  | 0.122  | 28 | 1.308  | 0.134  | 28 |
|                             | N-back                        | 0.713                 | 0.083  | 32   | 0.795  | 0.081                 | 31 | 0.741  | 0.071  | 32             | 0.822  | 0.059  | 32 | 0.727          | 0.079  | 30   | 0.744  | 0.082  | 30 | 0.706  | 0.086  | 28 | 0.753  | 0.080  | 28 |
| Trained Switching           | Task switching                | 30.785                | 8.562  | 32   | 51.981 | 11.841                | 31 | 32.786 | 7.318  | 33             | 53.997 | 10.774 | 33 | 29.694         | 8.414  | 30   | 37.298 | 8.655  | 30 | 28.981 | 8.312  | 28 | 39.141 | 6.613  | 28 |
|                             | Rule switching                | 22.404                | 9.258  | 32   | 44.212 | 11.851                | 31 | 22.588 | 7.184  | 33             | 44.660 | 11.540 | 33 | 22.075         | 8.054  | 30   | 26.645 | 8.837  | 30 | 21.276 | 7.829  | 28 | 27.356 | 8.054  | 28 |
| Updating Untrained Stimuli  | Running span                  | 1.295                 | 0.162  | 32   | 1.451  | 0.158                 | 31 | 1.291  | 0.154  | 33             | 1.479  | 0.115  | 33 | 1.310          | 0.163  | 30   | 1.352  | 0.173  | 30 | 1.276  | 0.119  | 28 | 1.310  | 0.124  | 28 |
|                             | N-back                        | 0.715                 | 0.092  | 32   | 0.792  | 0.093                 | 31 | 0.714  | 0.084  | 33             | 0.840  | 0.041  | 31 | 0.699          | 0.090  | 30   | 0.723  | 0.098  | 30 | 0.683  | 0.101  | 27 | 0.743  | 0.096  | 27 |
| Switching Untrained Stimuli | Task switching                | 24.717                | 8.203  | 32   | 43.800 | 12.345                | 31 | 25.570 | 7.143  | 33             | 43.963 | 9.936  | 33 | 23.812         | 8.413  | 30   | 30.592 | 8.512  | 30 | 23.354 | 7.309  | 28 | 31.134 | 8.508  | 28 |
|                             | Rule switching                | 38.799                | 15.529 | 32   | 58.328 | 14.552                | 31 | 38.603 | 11.573 | 33             | 59.104 | 10.997 | 33 | 34.356         | 12.611 | 30   | 45.610 | 14.189 | 30 | 36.679 | 10.939 | 28 | 46.658 | 12.070 | 28 |
| Updating Untrained Task     | Spatial updating              | 1.166                 | 0.495  | 32   | 1.306  | 0.621                 | 32 | 1.172  | 0.537  | 32             | 1.278  | 0.503  | 32 | 0.997          | 0.452  | 30   | 1.243  | 0.561  | 30 | 1.111  | 0.563  | 28 | 1.204  | 0.587  | 28 |
|                             | Numerical updating            | 1.878                 | 0.833  | 32   | 2.203  | 0.905                 | 32 | 1.933  | 0.840  | 33             | 2.318  | 0.948  | 33 | 1.893          | 0.989  | 30   | 2.167  | 0.973  | 30 | 1.782  | 0.773  | 28 | 2.086  | 0.697  | 28 |
| Switching Untrained Task    | Spatial Switching             | 30.160                | 12.323 | 32   | 42.621 | 13.622                | 32 | 29.775 | 10.748 | 33             | 44.540 | 11.566 | 33 | 29.300         | 11.501 | 30   | 39.101 | 11.852 | 30 | 28.234 | 9.954  | 28 | 39.904 | 10.744 | 28 |
|                             | Numerical Switching           | 36.562                | 14.190 | 32   | 45.628 | 13.649                | 32 | 37.357 | 11.099 | 33             | 46.666 | 13.107 | 33 | 33.313         | 9.960  | 30   | 41.379 | 11.541 | 30 | 32.950 | 10.836 | 28 | 42.367 | 12.921 | 28 |
| Spatial Reasoning           | Raven's Progressive Matrices  | 7.060                 | 2.723  | 32   | 7.880  | 2.860                 | 32 | 6.880  | 2.355  | 33             | 8.090  | 2.754  | 33 | 6.970          | 3.023  | 30   | 8.000  | 2.303  | 30 | 6.930  | 2.260  | 28 | 7.540  | 2.617  | 28 |
|                             | WASI-II Matrices              | 21.220                | 3.405  | 32   | 21.340 | 3.442                 | 32 | 21.840 | 2.343  | 32             | 21.660 | 2.280  | 32 | 20.700         | 3.515  | 30   | 21.170 | 3.395  | 30 | 21.460 | 2.442  | 28 | 21.180 | 3.056  | 28 |
| Verbal Reasoning            | BETA-III Matrices             | 17.750                | 3.877  | 32   | 17.910 | 3.675                 | 32 | 17.520 | 3.607  | 33             | 19.090 | 2.708  | 33 | 17.600         | 3.692  | 30   | 17.900 | 3.881  | 30 | 18.180 | 2.868  | 28 | 18.210 | 3.213  | 28 |
|                             | BIS Analogies                 | 5.620                 | 2.268  | 32   | 5.840  | 2.424                 | 32 | 5.150  | 2.224  | 33             | 5.560  | 2.422  | 32 | 4.970          | 2.428  | 30   | 5.630  | 2.526  | 30 | 5.290  | 2.123  | 28 | 5.960  | 2.516  | 28 |
| Episodic Memory             | ETS Kai Verbal Inference      | 18.160                | 3.993  | 32   | 17.690 | 3.450                 | 32 | 17.760 | 4.528  | 33             | 18.360 | 3.723  | 33 | 16.830         | 4.997  | 30   | 17.970 | 4.165  | 30 | 16.750 | 4.351  | 28 | 18.040 | 3.930  | 28 |
|                             | Verbal Memory                 | 16.560                | 4.508  | 32   | 16.970 | 5.294                 | 32 | 17.090 | 4.489  | 33             | 16.120 | 5.331  | 33 | 17.330         | 4.113  | 30   | 17.100 | 5.827  | 30 | 16.390 | 5.600  | 28 | 17.320 | 6.159  | 28 |
| Sustained Attention         | Spatial Memory                | 12.090                | 3.921  | 32   | 13.840 | 3.638                 | 32 | 13.030 | 3.828  | 33             | 13.520 | 3.743  | 33 | 13.370         | 2.895  | 30   | 13.630 | 3.146  | 30 | 12.180 | 3.255  | 28 | 13.180 | 3.732  | 28 |
|                             | Temporal Expectancy Task 1    | 0.224                 | 0.149  | 31   | 0.217  | 0.114                 | 31 | 0.190  | 0.137  | 33             | 0.162  | 0.131  | 33 | 0.184          | 0.132  | 30   | 0.184  | 0.126  | 30 | 0.177  | 0.139  | 28 | 0.215  | 0.116  | 28 |
| Perceptual Speed            | Temporal Expectancy Task 2    | 0.244                 | 0.135  | 32   | 0.201  | 0.129                 | 31 | 0.177  | 0.124  | 33             | 0.142  | 0.119  | 31 | 0.194          | 0.119  | 30   | 0.200  | 0.144  | 30 | 0.116  | 0.128  | 27 | 0.239  | 0.147  | 28 |
|                             | Perceptual matching trained   | 25.798                | 4.355  | 32   | 28.513 | 5.635                 | 31 | 26.535 | 5.108  | 33             | 29.676 | 6.834  | 33 | 25.152         | 6.523  | 30   | 38.676 | 8.849  | 30 | 25.725 | 6.318  | 28 | 39.308 | 8.821  | 28 |
|                             | Perceptual matching untrained | 20.355                | 6.090  | 32   | 25.239 | 7.697                 | 31 | 19.327 | 5.507  | 33             | 24.488 | 6.574  | 33 | 18.185         | 6.678  | 30   | 32.772 | 9.657  | 30 | 19.927 | 6.193  | 28 | 33.350 | 8.483  | 28 |

## S7. Model fit for the eight considered latent change score models.

| Variable                                   | $\chi^2$ difference test |       | RMSEA | CFI   |
|--------------------------------------------|--------------------------|-------|-------|-------|
|                                            | $\chi^2$ (df,n)          | p     |       |       |
| Updating Trained <sup>1</sup>              | 10.59 (10,123)           | 0.390 | 0.022 | 0.998 |
| Switching Trained <sup>3</sup>             | 5.665 (6,123)            | 0.462 | 0.001 | 1.000 |
| Updating Untrained Stimuli<br><sup>1</sup> | 12.052 (9,123)           | 0.210 | 0.053 | 0.987 |
| Updating Untrained Task <sup>1</sup>       | 6.736 (9,123)            | 0.665 | 0.001 | 1.000 |
| Spatial reasoning <sup>3</sup>             | 24.961 (19,123)          | 0.162 | 0.051 | 0.970 |
| Verbal reasoning <sup>2</sup>              | 24.04 (21,123)           | 0.291 | 0.034 | 0.992 |
| Episodic memory <sup>3</sup>               | 5.337 (6,123)            | 0.501 | 0.001 | 1.000 |
| Perceptual speed <sup>3</sup>              | 4.494 (6,123)            | 0.610 | 0.001 | 1.000 |

Fit indices are reported at the strict <sup>1</sup>, strong <sup>2</sup> or weak <sup>3</sup> level of measurement invariance. RMSEA=root mean square error of approximation. CFI=comparative fit index. A non-significant  $\chi^2$  difference test, an RMSEA of less than 0.06 and a CFI of more than 0.95 indicates good fit of the model.

## S8. Literature search flow.

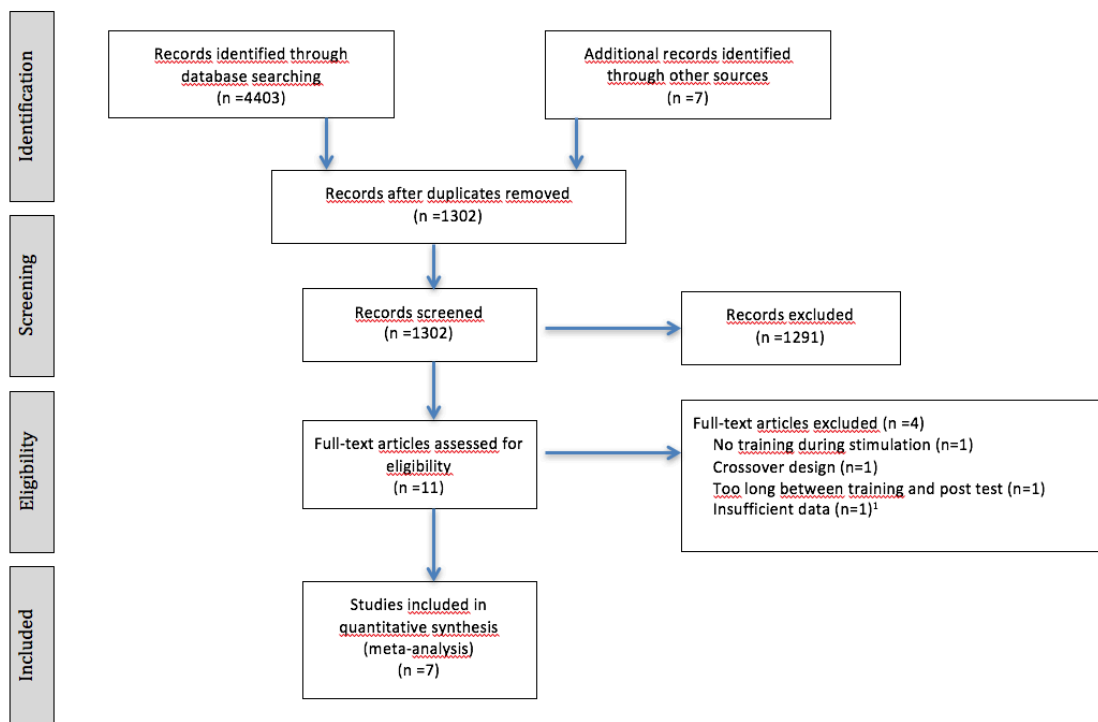

<sup>1</sup>The study excluded due to insufficient data (Park, Seo, Kim, & Ko, 2014) met other inclusion criteria, but reported a very low standard deviation (a suspected typo) for one of the tasks at baseline (Table 2, digit span forward, sham group), which would, with our way of calculating net effect sizes, bias the effect size from this study towards a large negative effect of anodal stimulation. Because uncertainty on the accuracy of this data and with data on several other administered tasks also not being reported in the article, we decided to not include this study in the meta-analysis (despite repeated attempts, the authors also did not respond to our questions).

## S9. Outcome measures selected for calculation of effect sizes for meta-analysis.

| <i>Study</i>            | <i>Outcome task</i>                                                                                                                                                                                                                                                                                                                                                                                                                                                                                                                                                                                             | <i>Selected outcome measure</i>                                                                                                                                                                                                                                                                                                                                                                                                                                                                                                                                                                                                                                                                                                                                                                                                                                                                                                                |
|-------------------------|-----------------------------------------------------------------------------------------------------------------------------------------------------------------------------------------------------------------------------------------------------------------------------------------------------------------------------------------------------------------------------------------------------------------------------------------------------------------------------------------------------------------------------------------------------------------------------------------------------------------|------------------------------------------------------------------------------------------------------------------------------------------------------------------------------------------------------------------------------------------------------------------------------------------------------------------------------------------------------------------------------------------------------------------------------------------------------------------------------------------------------------------------------------------------------------------------------------------------------------------------------------------------------------------------------------------------------------------------------------------------------------------------------------------------------------------------------------------------------------------------------------------------------------------------------------------------|
| Au et al., (2016)       | N-back*<br>Digit span*<br>Block-tapping task*<br>AX-Continuous Performance Task                                                                                                                                                                                                                                                                                                                                                                                                                                                                                                                                 | Hit rate minus false alarm rate<br>Total number of trials correctly repeated in forward and backwards versions<br>Total number of trials correctly reproduced in forward and backwards versions<br>Percentage accuracy during "AY" trials                                                                                                                                                                                                                                                                                                                                                                                                                                                                                                                                                                                                                                                                                                      |
| Jones et al., (2015)    | Digit span*<br>N-back*<br>Stroop                                                                                                                                                                                                                                                                                                                                                                                                                                                                                                                                                                                | Maximum numbers remembered<br>Correct hits and correct false alarm<br>Reaction times                                                                                                                                                                                                                                                                                                                                                                                                                                                                                                                                                                                                                                                                                                                                                                                                                                                           |
| Lally et al., (2013)    | N-back*                                                                                                                                                                                                                                                                                                                                                                                                                                                                                                                                                                                                         | $d'$ value <sup>1</sup>                                                                                                                                                                                                                                                                                                                                                                                                                                                                                                                                                                                                                                                                                                                                                                                                                                                                                                                        |
| Looi et al., (2016)     | Digit span*<br>Corsi blocks*                                                                                                                                                                                                                                                                                                                                                                                                                                                                                                                                                                                    | Maximum numbers correct in forward and backwards versions<br>Maximum blocks correct in forward and backwards versions                                                                                                                                                                                                                                                                                                                                                                                                                                                                                                                                                                                                                                                                                                                                                                                                                          |
| Martin et al., (2013)   | Digit span*<br>Serial sevens*<br>Letter number sequencing*<br>Trail Making Test A&B<br>Controlled Oral Word Association Test<br>Simple and choice Reaction Times                                                                                                                                                                                                                                                                                                                                                                                                                                                | Maximum numbers correct, forward and backwards together<br>Time in seconds to complete the task<br>Maximum length of sequences correct<br>Total time for completion<br>Numbers of words produced<br>Average response time in milliseconds                                                                                                                                                                                                                                                                                                                                                                                                                                                                                                                                                                                                                                                                                                      |
| Nilsson et al., (2016)  | BIS Analogies<br>Ravens Advanced Matrices<br>Syllogisms<br>Beta-III matrices<br>Wasi-II matrices<br>ETS kit Verbal inference<br>Spatial memory<br>Verbal memory<br>Spatial updating*<br>Numerical updating*<br>Spatial switching*<br>Numerical switching*<br>Temporal expectancy task version 1<br>Temporal expectancy task version 2<br>N-back trained*<br>N-back untrained*<br>Taskswitching trained*<br>Taskswitching untrained*<br>Rule switching trained*<br>Rule switching untrained*<br>Running span trained*<br>Running span untrained*<br>Perceptual matching trained<br>Perceptual matching untrained | Number correct within time limit<br>Number correct<br>Number correct<br>Number correct<br>Average number correct per trial<br>Average number correct per trial<br>Number correct per minute<br>Number correct per minute<br>Individual slope coefficient<br>Individual slope coefficient<br>(Number hits / total targets) + (number correct rejections/ total foils)<br>(Number hits / total targets) + (number correct rejections/ total foils)<br>Number correct per minute<br>Number correct per minute<br>Number correct per minute<br>Number correct per minute<br>Average number correct per trial (reflected log transform)<br>Average number correct per trial (reflected log transform)<br>Number correct per minute<br>Number correct per minute |
| Richmond et al., (2014) | Automated Operation Span*<br>Automated Symmetry Span*<br>Stroop<br>Antisaccade<br>Psychomotor Vigilance Task<br>Sustained Attention Response Task<br>Ravens<br>California Verbal Learning Test<br>Nelson-Denny Reading Test                                                                                                                                                                                                                                                                                                                                                                                     | The sum of all perfectly recalled sets<br>The sum of all perfectly recalled sets<br>ACC cost accuracy<br>ACC cost accuracy<br>Response time for correct trials<br>Response time for correct trials<br>Total correct answers<br>Number of correct answers<br>Number of correct answers                                                                                                                                                                                                                                                                                                                                                                                                                                                                                                                                                                                                                                                          |

\* Tasks selected for the analysis focusing on working memory performance

<sup>1</sup> Data was not available in tables, authors did not respond upon request for this data. Values were estimated from plot in the article (page 6) using software Plot Digitizer (version 2.6.8; Huwaldt, 2015)

S10. Results of main meta-analyses using pooled standard deviations at pretest ( $d_{ppc2}$  in Morris, 2008) for standardizing the effects.

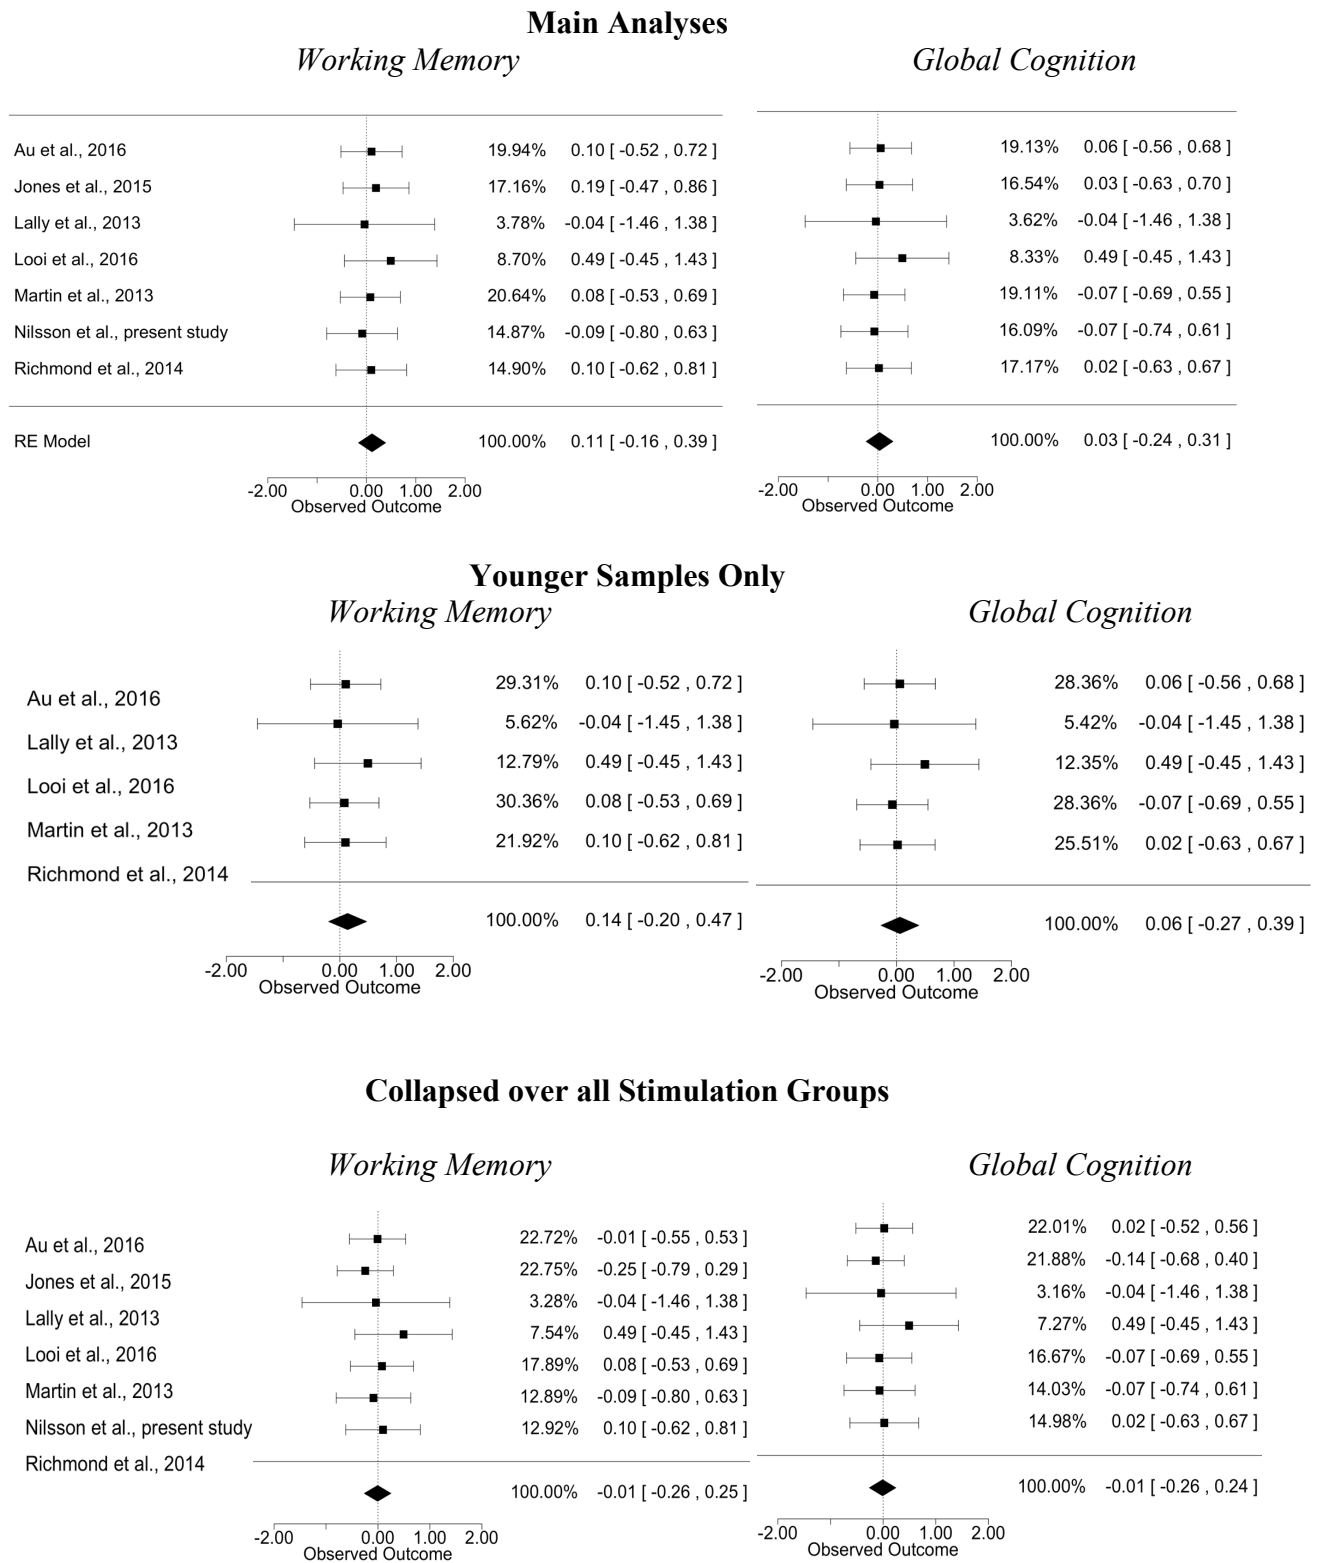



SOM11. Average ( $\pm$ SEM) maximum level of difficulty reached in each training task as a function of training session and stimulation group (tDCS vs. Sham) for the groups training working memory (A) and perceptual matching (B). Although average number of completed sessions were 19, the subject with the fewest sessions had 15 sessions completed, which is the reason for displaying the first 15 sessions only (where data is complete). Statistical analyses with a mixed 2 (stimulation group; tDCS vs. Sham) by 15 (training; training session 1-15) ANOVA (with linear and quadratic contrasts for training), revealed statistically significant main effects of training for all measures (all  $ps < .001$ ), but no statistically significant effects of stimulation (all  $ps > .261$ ) and no stimulation  $\times$  training interaction (all  $ps > .088$ ). Comparisons between stimulation groups run separately for each training session showed no statistically significant effects (all  $ps > .055$ ).

### A. Working Memory Training

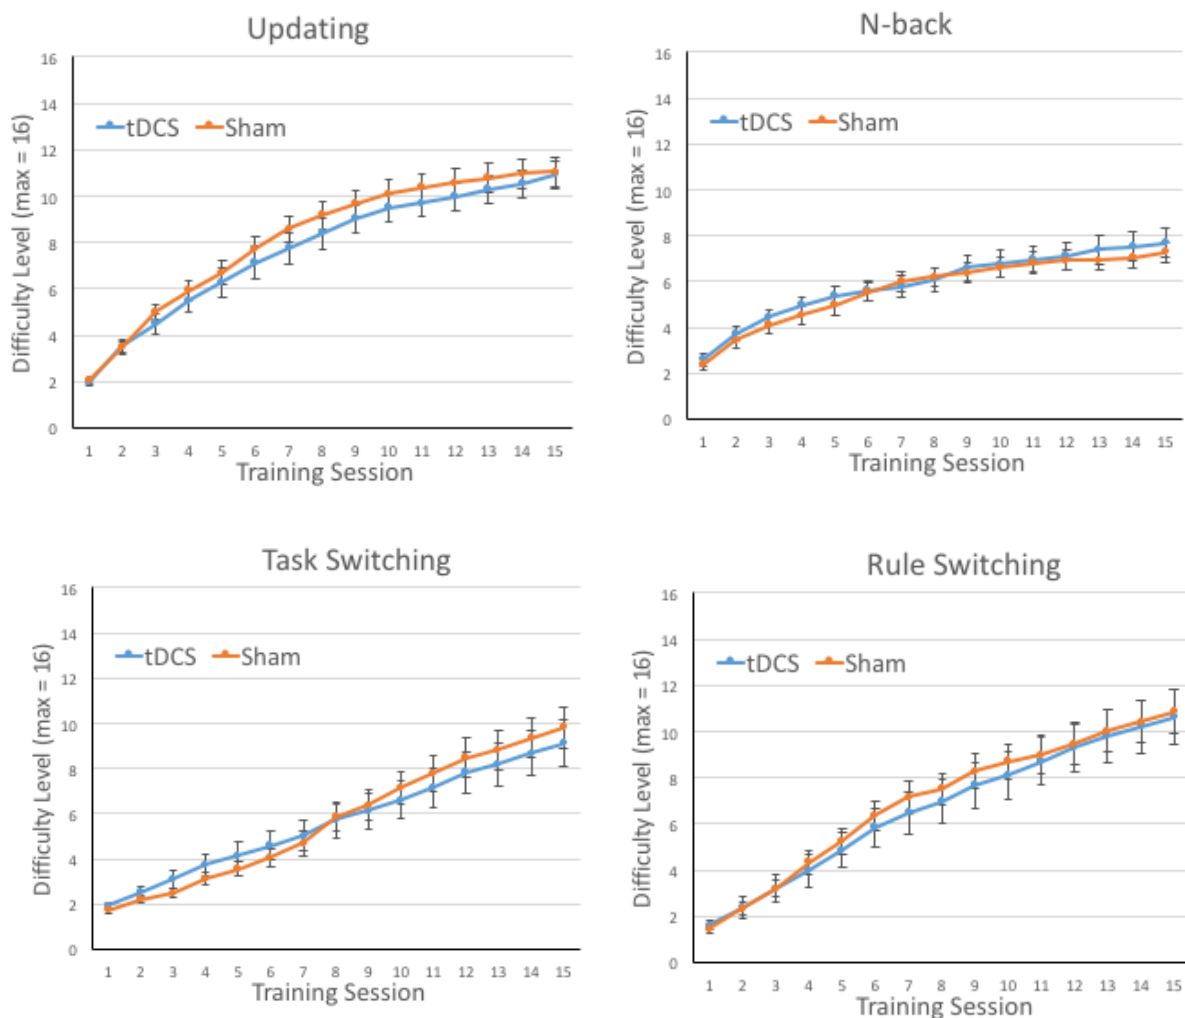

**B. Perceptual-Matching Training**

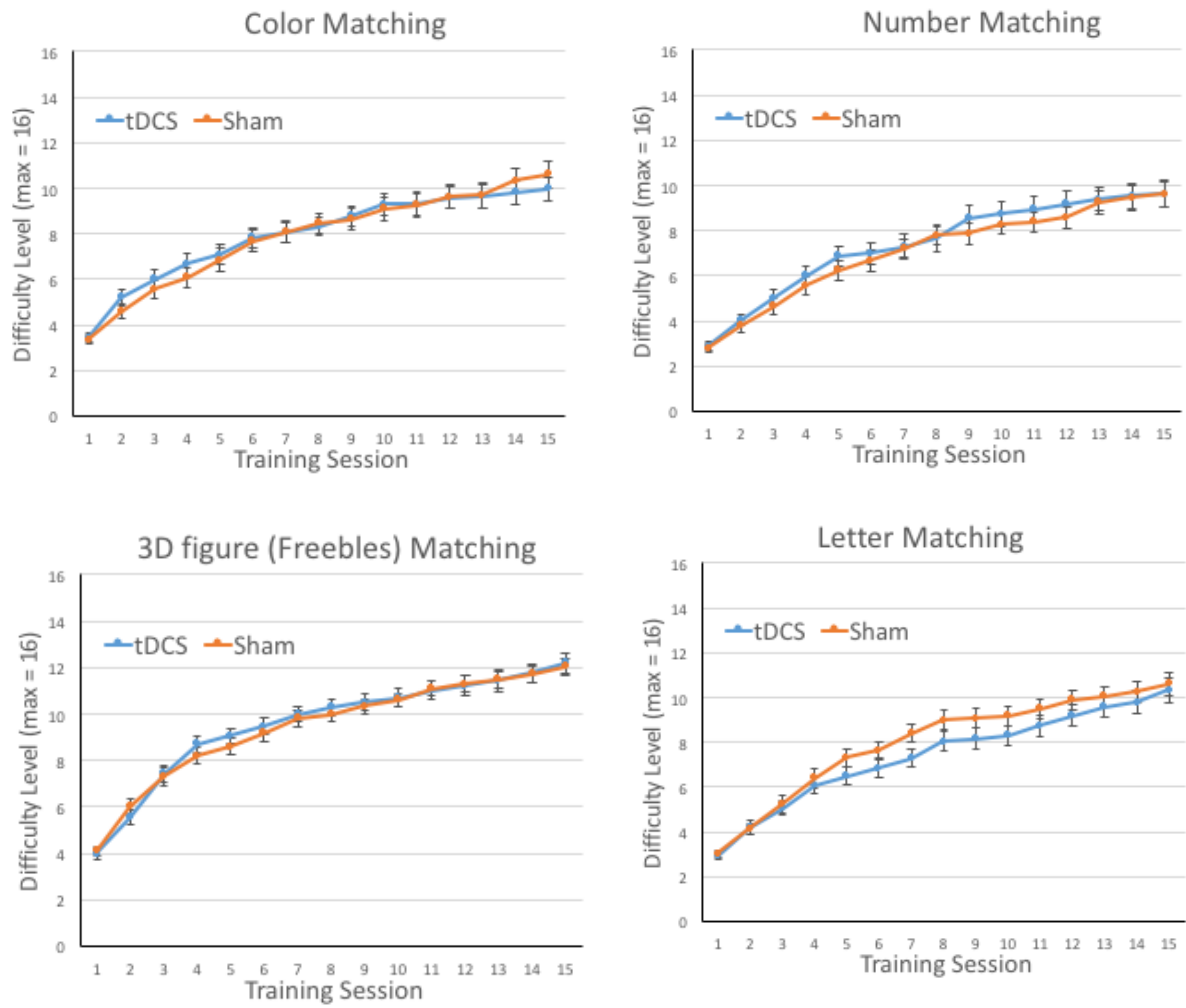

## SOM12. Description of studies included in meta-analysis, including a reference list.

| Study                      | Sample size<br>tDCS (m/f) | Sample size<br>sham (m/f) | Mean age tDCS (SD) | Mean age sham (SD) | Anode | Cathode                    | Current<br>intensity<br>(mA) | Current<br>density<br>(mA/cm <sup>2</sup> ) | Duration | Training type<br>(adaptive)   | Training<br>duration | Online/<br>Offline <sup>1</sup> | Blinding <sup>2</sup> | No of<br>session |
|----------------------------|---------------------------|---------------------------|--------------------|--------------------|-------|----------------------------|------------------------------|---------------------------------------------|----------|-------------------------------|----------------------|---------------------------------|-----------------------|------------------|
| Au et al.,<br>(2016)       | 20 (9/11)                 | 22 (8/14)                 | 21.55 (2.86)*      | 20.52 (1.93)       | F3    | Contralateral supraorbital | 2                            | 0.057                                       | 25 min,  | Working memory (adaptive)     | 20-25 min            | Online                          | Single, assessed      | 7 over 2 weeks   |
| Jones et al.,<br>(2015)    | 18                        | 18                        | 63.94 (4.30)       | 64.33 (5.24)       | F4    | Contralateral cheek        | 1.5                          | 0.043                                       | 10 min   | Working memory (non-adaptive) | 60 min               | Offline                         | Single, assessed      | 10 over 2 weeks  |
| Lally et al.,<br>(2013)    | 10                        | 11                        | 23.09 (3.85)*      |                    | F3    | Contralateral cheek        | 1                            | 0.029                                       | 10 min   | Working memory (non-adaptive) | 20 min               | Online                          | Double, not assessed  | 2 over 2 days    |
| Looi et al.,<br>(2016)     | 10 (4/6)                  | 10 (2/8)                  | 24.6 (3.8)*        | 23.9 (2.5)         | F4    | F3                         | 1                            | 0.04                                        | 30 min   | Mathematical (adaptive)       | 30 min               | Online                          | No info               | 2 within 3 days  |
| Martin et al.,<br>(2013)   | 21 (12/9)                 | 21 (13/8)                 | 23.1 (2.78)*       | 23.2 (6.80)        | F3    | Right deltoid muscle       | 2                            | 0.057                                       | 30 min   | Working memory (adaptive)     | 25 min               | Online                          | Single, assessed      | 10 over 2 weeks  |
| Nilsson et al.,<br>(2016)  | 32 (16/16)                | 33 (11/22)                | 69.31 (2.73)       | 69.64 (2.97)       | F3    | Contralateral supraorbital | 2                            | 0.057                                       | 25 min   | Working memory (adaptive)     | 45 min               | Online                          | Double, assessed      | 20 over 4 weeks  |
| Richmond et al.,<br>(2014) | 20 (7/13)                 | 20 (7/13)                 | 20.7*              | 20.7               | F3    | F4                         | 1.5                          | 0.043                                       | 15 min   | Working memory (adaptive)     | 30 min               | Online                          | Single, not assessed  | 10 over 2 weeks  |

<sup>1</sup> Online = stimulation administered in direct conjunction with training, Offline = stimulation administered before training.

<sup>2</sup> Single = participants blinded to stimulation, Double = participants and experimenters blinded to stimulation

\* Studies included in the subanalysis focusing on young test samples only

Age descriptives in the Lally et al., (2013) study were only available for the full sample.

**Studies included in meta-analysis**

- Au J, Katz B, Buschkuehl M, Bunarjo K, Senger T, Zabel C, Jaeggi SM, Jonides J. 2016. Enhancing Working Memory Training with Transcranial Direct Current Stimulation. *J Cogn Neurosci* 28:1419-1432.
- Jones KT, Stephens JA, Alam M, Bikson M, Berryhill ME. 2015. Longitudinal neurostimulation in older adults improves working memory. *Plos One* 10:e0121904.
- Lally N, Nord CL, Walsh V, Roiser JP. 2013. Does excitatory fronto-extracerebral tDCS lead to improved working memory performance? *F1000Res* 2:219.
- Looi CY, Duta M, Brem AK, Huber S, Nuerk HC, Cohen Kadosh R. 2016. Combining brain stimulation and video game to promote long-term transfer of learning and cognitive enhancement. *Scientific reports* 6:22003.
- Martin DM, Liu R, Alonzo A, Green M, Player MJ, Sachdev P, Loo CK. 2013. Can transcranial direct current stimulation enhance outcomes from cognitive training? A randomized controlled trial in healthy participants. *Int J Neuropsychopharmacol* 16:1927-1936.
- Richmond L, Wolk D, Chein J, Olson IR. 2014. Transcranial Direct Current Stimulation Enhances Verbal Working Memory Training Performance over Time and Near-transfer Outcomes. *J Cogn Neurosci*.
